# Supplementary material
Source: Springer Nature journal article supplement (https://www.springermedizin.de/resource/supplementary/12887_2012_794_MOESM2_ESM.pdf/9476204)

### Physical activity knowledge

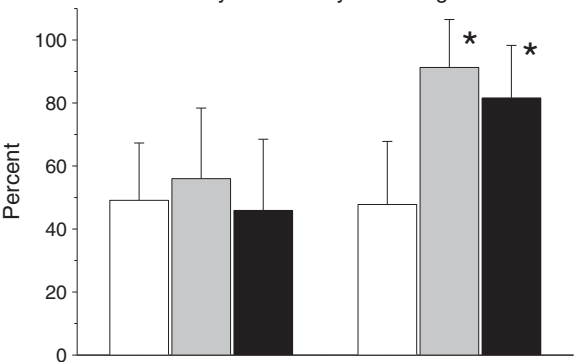

### Physical activity preference

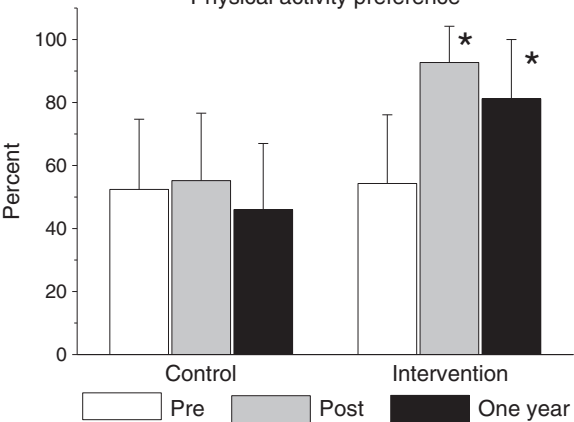

Supplement: MOESM2 [file 9476204]
